# Supplementary material for: Efficient and stable hybrid conjugated polymer/perovskite quantum dot solar cells
Source: Royal Society of Chemistry journal article supplement (doi:10.1039/d3qm00015j), 2023-01-01
Supplement: d3qm00015j1.pdf [file d3qm00015j1.pdf]

Electronic Supplementary Material

**Efficient and Stable Hybrid Conjugated Polymer/Perovskite Quantum Dot Solar Cell**

Hehe Huang,<sup>[a,b]</sup> Xuliang Zhang,<sup>[a,c]</sup> Chenyu Zhao,<sup>[a,b]</sup> Jianyu Yuan\*<sup>[a,b]</sup>

*<sup>a</sup>Institute of Functional Nano & Soft Materials (FUNSOM), Soochow University, Suzhou, Jiangsu  
215123, P. R. China*

*<sup>b</sup>Jiangsu Key Laboratory of Advanced Negative Carbon Technologies, Soochow University, Suzhou,  
215123, Jiangsu, P. R. China*

*<sup>c</sup>Jiangsu Key Laboratory for Carbon-Based Functional Materials and Devices, Soochow University,  
Suzhou, Jiangsu 215123, P. R. China*

\*Corresponding author: [jyyuan@suda.edu.cn](mailto:jyyuan@suda.edu.cn)

## 1. Materials

Cesium carbonate ( $\text{Cs}_2\text{CO}_3$ , 99.9%, Sigma), lead iodide ( $\text{PbI}_2$ , 99.9%, Adamas), 1-octadecene (ODE, 90%, J&k), oleic acid (OA, 90%, Aldrich), oleylamine (OAm, 90%, Aladdin), n-hexane (anhydrous 97.5%, J&K), n-octane (anhydrous,  $\geq 98\%$ , Alfa Aesar), methyl acetate (MeOAc, anhydrous 99%, J&k), toluene (analytical reagent, 98%, Chinasun Specialty Products Co., Ltd. ), PFNBr titanium tetrachloride ( $\text{TiCl}_4$ ,  $\geq 98\%$ , Sinopharm Chemical Reagent Co., Ltd. ), tris(pentafluorophenyl)borane (95%, Acros Organics), poly(triarylamine) (PTAA) and formamidinium iodide (FAI) are all purchased from Xi'an Polymer Light Technology Crop. (China). All the materials were used directly without further purification. Glass/FTO were purchased from Advanced Election Technology Co., Ltd (China).

## 2. Characterization

The UV-vis absorption spectroscopy was recorded on a Perkin Elmer model Lambda 750 spectrophotometer. The PL spectra were performed by a FluoroMax-4 spectrofluorometer (HORIBA Scientific) with excitation wavelength at 410 nm. TRPL spectra were obtained using a Hamamatsu streak camera. PL data were analyzed on a Nikon 50x objective (N.A. 0.55) in a Nikon ME600 optical microscope. FTIR spectra were collected using a Bruker HYPERION FTIR spectrometer and cumulated 32 scans at a resolution of  $4\text{ cm}^{-1}$ . The TEM images were recorded by a Tecnai G2 F20 S-Twin system operated at 200 kV. The fs-TA measurements were performed on a Helios pump-probe system (150 fs, 1 kHz) combined with an amplified femtosecond laser system (excitation wavelength at 400 nm and laser energy of  $2\ \mu\text{J cm}^{-2}$ ). The top view and cross-section image were obtained from SEM (a Zeiss G500 with the extra high tension of 10 kV).

*J-V* curves of the devices carried out at a Keithley 2400 Digital Source Meter under N<sub>2</sub> glovebox and simulated AM 1.5G spectrum at 100 mW cm<sup>-2</sup> with a solar simulator (Class AAA, 94023A-U, Newport). The active area of 7.25 mm<sup>2</sup> was defined by a shadow mask. The external quantum efficiency (EQE) measurement of the solar cells was measured by a Solar Cell Scan 100 system (Zolix Instruments Co. Ltd.).

### **3. CsPbI<sub>3</sub> QDs synthesis**

2 g (6.14 mmol) of Cs<sub>2</sub>CO<sub>3</sub> was loaded into a 250 mL three-neck flask along with 8 mL of OA and 100 mL of ODE. After continuous stirring at 90 °C under vacuum for 1 hour, the flask was filled with N<sub>2</sub> and heated up to 120 °C until CsCO<sub>3</sub> completely reacted with OA to form the clarified Cs-oleate. The solution was then transferred to N<sub>2</sub> glovebox and preheated to 100 °C to avoid solidification before use.

Meanwhile, 1 g (2.16 mmol) PbI<sub>2</sub> and 50 mL ODE were added into another 250 mL three-neck flask and degassed under vacuum at 90 °C for 1 hour with continuous stirring. Then, the switch was converted to N<sub>2</sub> flow, followed by 5 mL of OA and 5 mL of OAm were injected into the flask. Subsequently, the mixture was vacuumed again and maintain the temperature until the PbI<sub>2</sub> was completely dissolved. Then, the reaction system was heated up to 160 °C under N<sub>2</sub> atmosphere and 4 mL preheated Cs-oleate was quickly injected. After 5 s, the reaction flask was rapidly quenched to room temperature by an ice bath.

### **4. CsPbI<sub>3</sub> QDs purification**

All purification procedures were carried out under a N<sub>2</sub> atmosphere. For the first step purification

process, the crude solution was packed into six centrifuge tubes equally and a triple volume of antisolvent MeOAc was added into it, followed by centrifugation at 8000 rpm for 5 min. Afterward, the precipitate was collected and dissolved in 3 mL hexane for each tube with the supernatant discarded. For the second step purification process, the equal volume MeOAc was added to the solution and centrifuged at 8000 rpm for 3 min. Finally, the purified precipitate was dispersed in 20 mL of hexane total and centrifuged at 4000 rpm for 5 min to remove excess  $\text{PbI}_2$  and Cs-oleate. Before use, the supernatant was stored in the dark at 0 °C in the refrigerator to precipitate excess Cs-oleate and Pb-oleate.

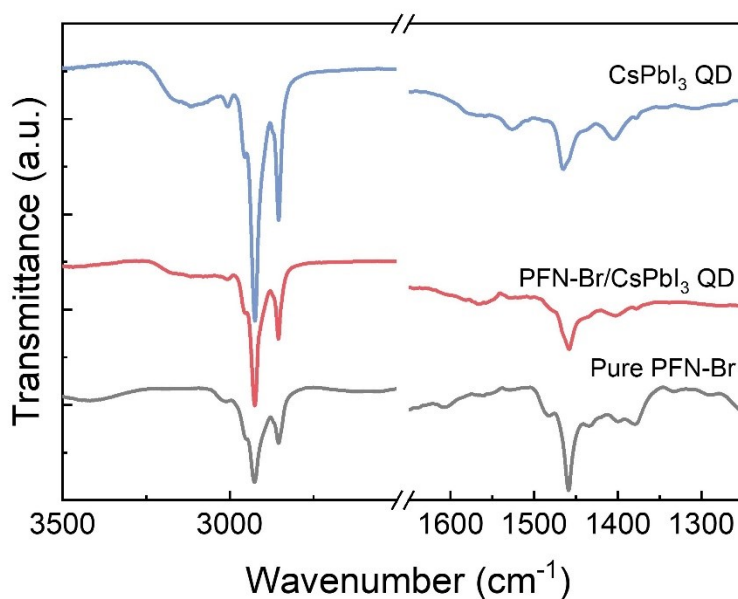

Figure S1. FTIR spectra of CsPbI<sub>3</sub> QD, PFN-Br and PFN-Br/CsPbI<sub>3</sub> QD.

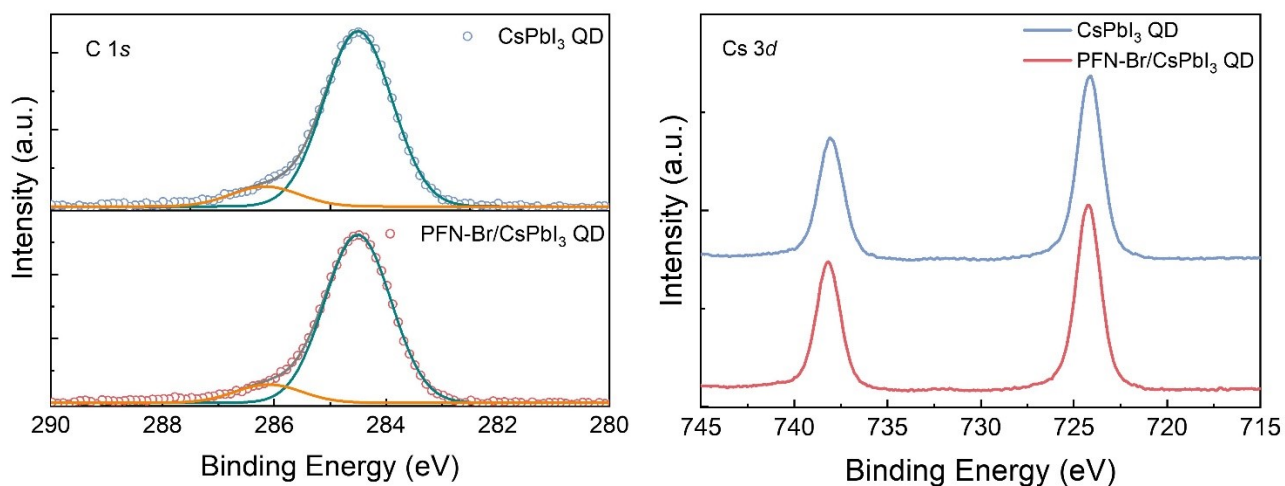

Figure S2. C 1s and Cs 3d XPS core level spectra of CsPbI<sub>3</sub> QD and PFN-Br/CsPbI<sub>3</sub> QD.

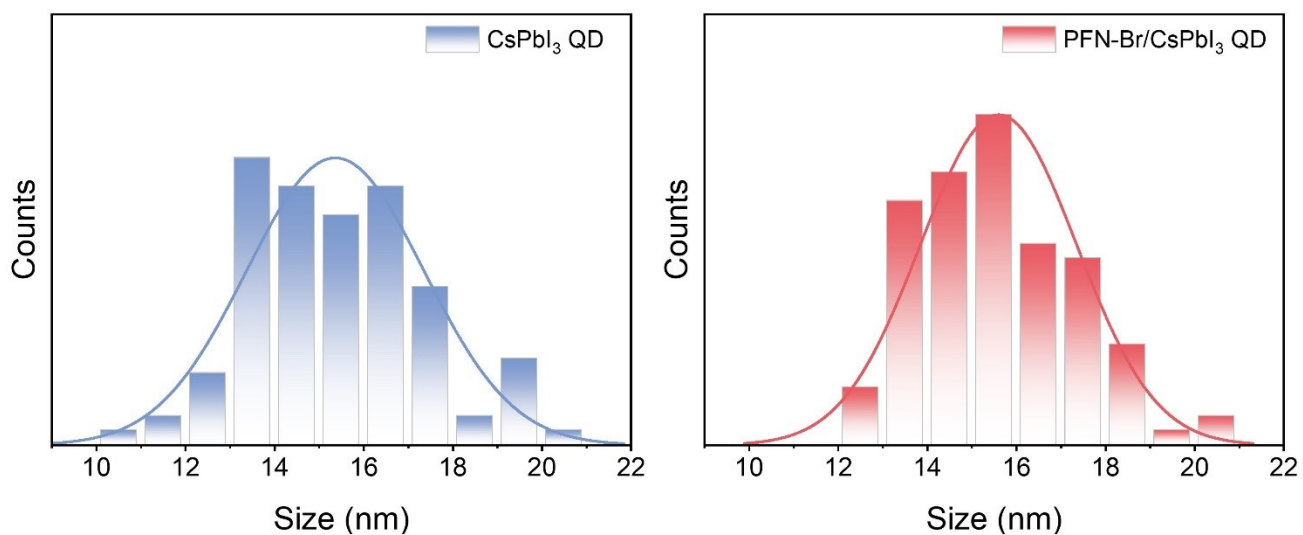

Figure S3. The size distributions of Control and PFN-Br/CsPbI<sub>3</sub> QDs.

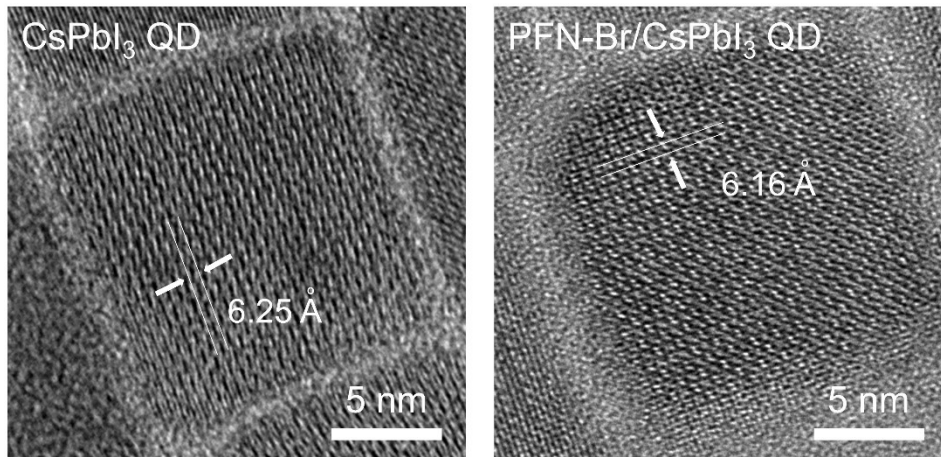

Figure S4. The HRTEM image of CsPbI<sub>3</sub> QD and PFN-Br/CsPbI<sub>3</sub> QD.

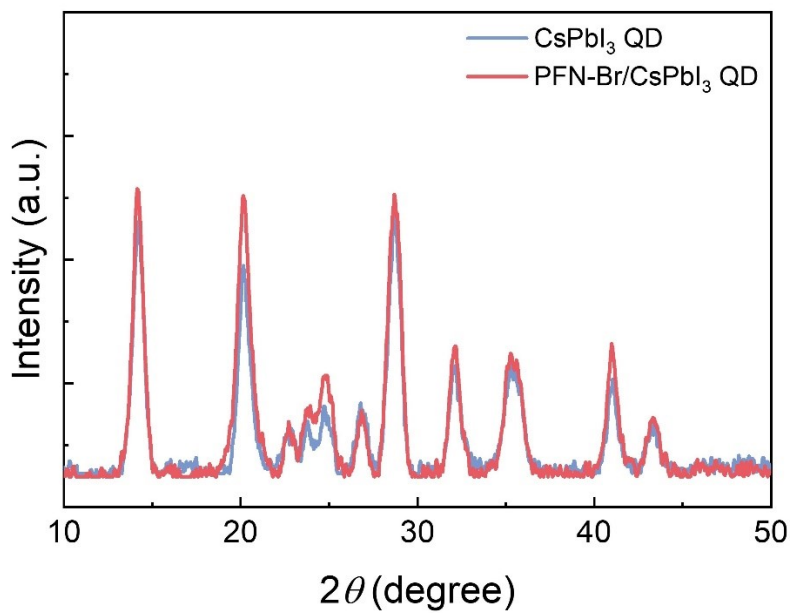

Figure S5. The XRD patterns of CsPbI<sub>3</sub> QD and hybrid PFN-Br/CsPbI<sub>3</sub> QD films.

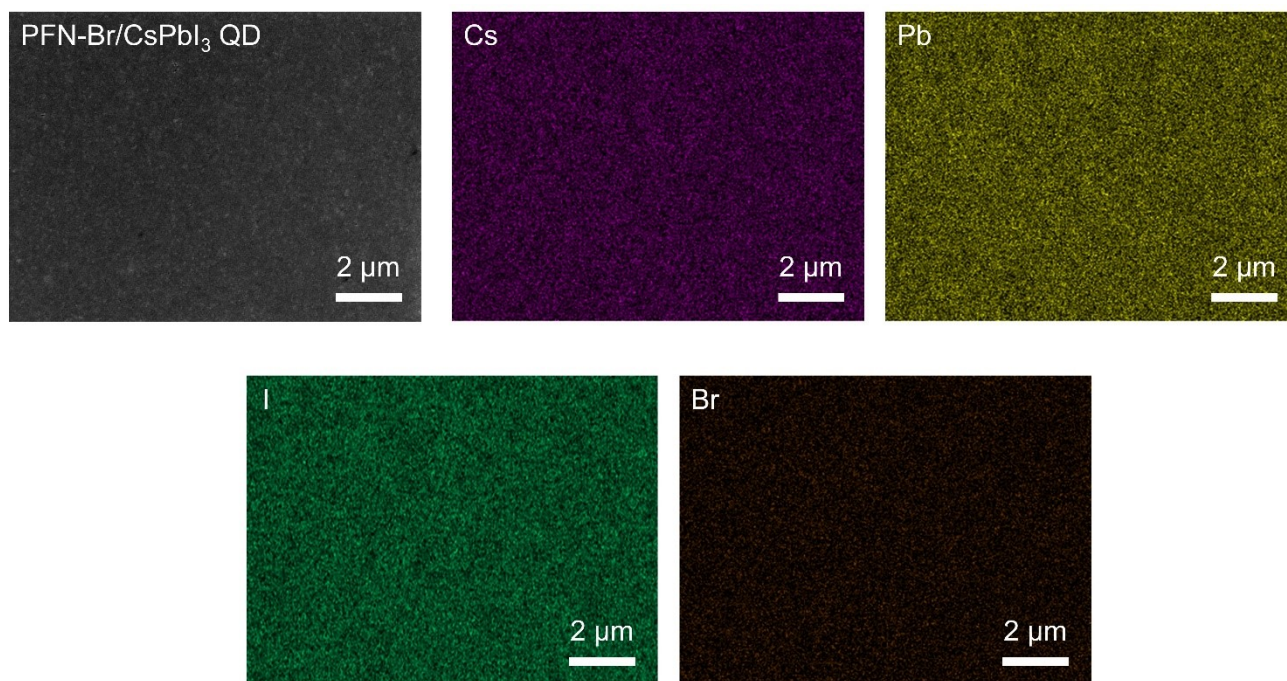

Figure S6. SEM image and the corresponding elemental mappings of the PFN-Br/CsPbI<sub>3</sub> QD film.

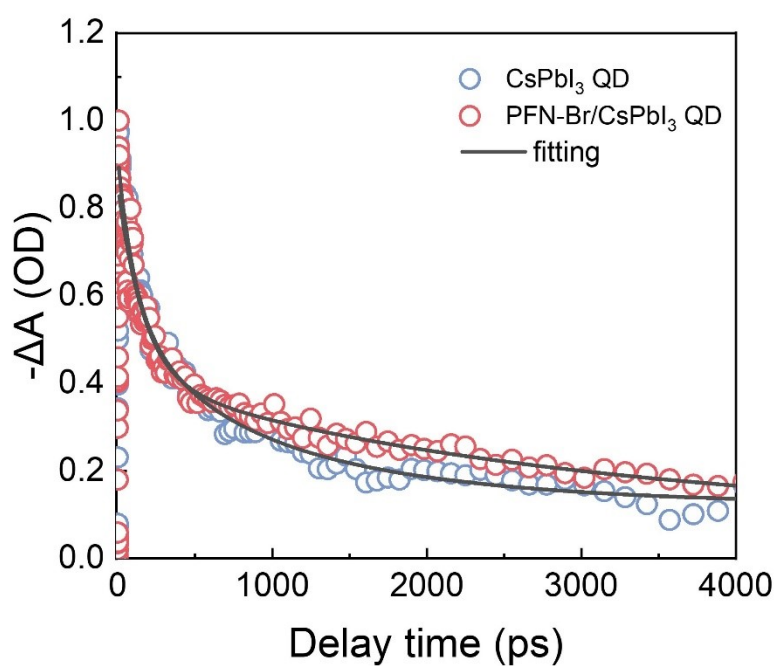

Figure S7. The corresponding GSB decay spectra from the pseudo-colour TA maps.

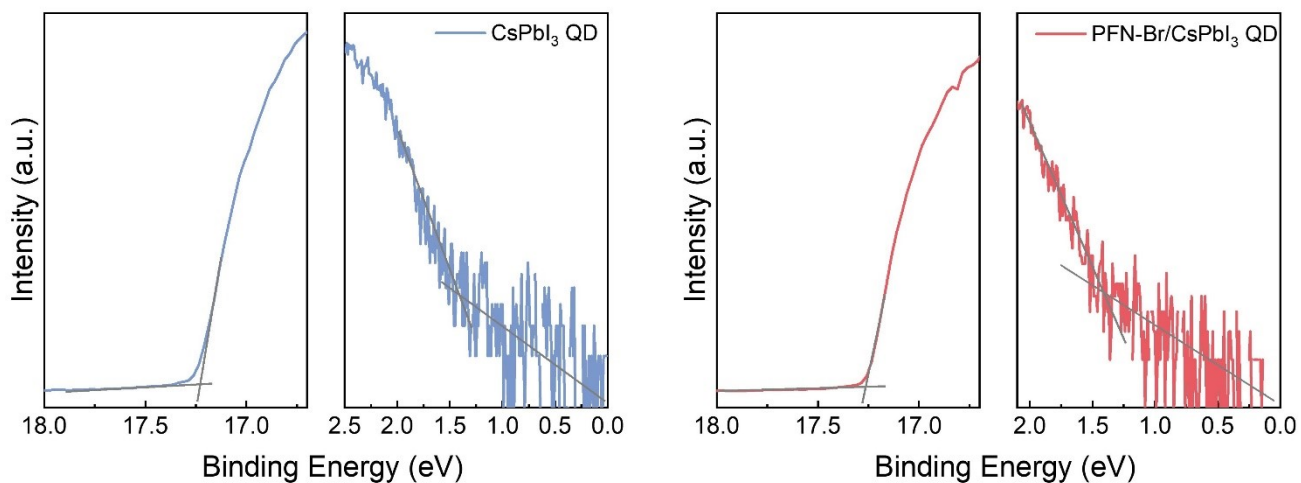

Figure S8. UPS plots of control CsPbI<sub>3</sub> QD film and the PFN-Br/CsPbI<sub>3</sub> QD film.

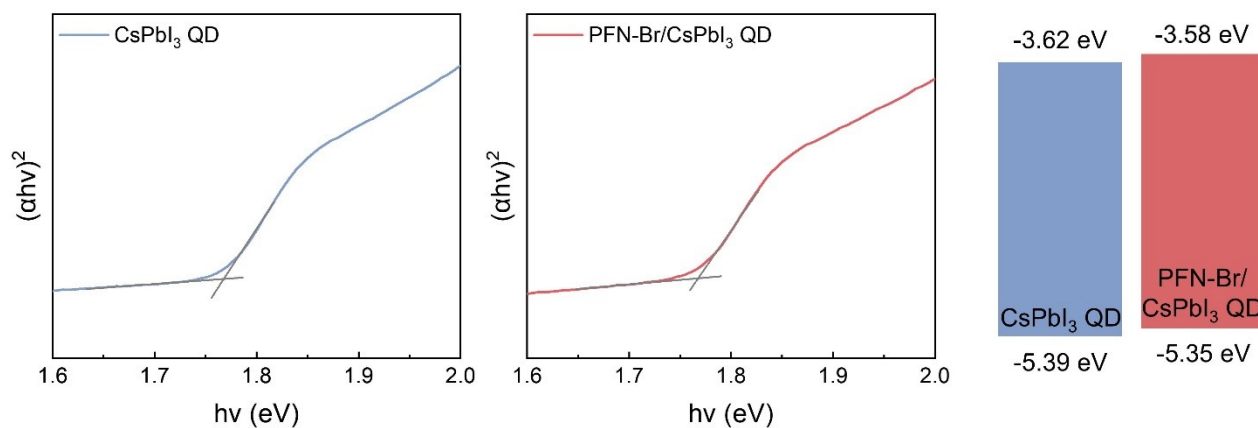

Figure S9. Tauc plots of control and the PFN-Br/CsPbI<sub>3</sub> QD films with the energy level diagram of both samples.

Table S1. The detailed parameters of TRPL spectra.

| Sample                       | $A_1$ | $\tau_1$ (ns) | $A_2$ | $\tau_2$ (ns) | $\tau_{ave}$ (ns) |
|------------------------------|-------|---------------|-------|---------------|-------------------|
| CsPbI <sub>3</sub> QD        | 41.2  | 0.77          | 58.8  | 10.15         | 1.68              |
| PFN-Br/CsPbI <sub>3</sub> QD | 13.4  | 0.98          | 86.6  | 16.31         | 5.31              |



Table S2. Tri-exponential fitting parameters of TA delay data.

| Sample                       | $\tau_1$ (ps) | $\tau_2$ (ps) | $\tau_3$ (ps) |
|------------------------------|---------------|---------------|---------------|
| CsPbI <sub>3</sub> QD        | 106.74107     | 438.72        | 1354.45       |
| PFN-Br/CsPbI <sub>3</sub> QD | 164.446       | 473.24        | 2993.08       |

Table S3. The detailed device parameters extracted from  $J$ - $V$  curves of CsPbI<sub>3</sub> PQD solar cells

| Condition                    | $V_{oc}$ (V) | $J_{sc}$ (mA cm <sup>-2</sup> ) | FF   | PCE (%) |
|------------------------------|--------------|---------------------------------|------|---------|
| CsPbI <sub>3</sub> QD        | 1.232        | 14.96                           | 0.72 | 13.31   |
| PFN-Br/CsPbI <sub>3</sub> QD | 1.251        | 16.22                           | 0.74 | 15.07   |
